# Supplementary material
Source: PubMed Central journal article supplement (PMC5300908)
Supplement: NIHMS817838-supplement-supplement_1.pdf [file NIHMS817838-supplement-supplement_1.pdf]

## Supplementary Material

**Title:** Leveraging contact network structure in the design of cluster randomized trials

**Supplementary Table 1: Probability of rejecting null hypothesis of no effect of intervention comparing incidence in treatment cluster to control cluster**

|                                    | $T_k + 1$ | $T_k + 2$ | $T_k + 3$ | $T_k + 4$ | $T_k + 5$ | $T_k + 6$ | $T_k + 7$ | $T_k + 8$ | $T_k + 9$ | $T_k + 10$ |
|------------------------------------|-----------|-----------|-----------|-----------|-----------|-----------|-----------|-----------|-----------|------------|
| Stepped Wedge designs              |           |           |           |           |           |           |           |           |           |            |
| Standard Stepped Wedge             | 61.8      | 82.7      | 90.4      | 93.5      | 94.4      | 95.4      | 96.1      | 96.4      | 96.6      | 97         |
| Static Rank Fuzzy Order            | 47.1      | 59.8      | 64.5      | 67.9      | 69.5      | 70.5      | 71        | 71.2      | 71        | 72         |
| Adaptive Rank Fuzzy Order          | 56.3      | 74.7      | 80.6      | 84.2      | 87.1      | 88.5      | 89.4      | 90.3      | 90.5      | 91         |
| Static Rank Fuzzy Order Holdback-1 | 45.8      | 59.3      | 65.6      | 68.8      | 70.9      | 71.2      | 71.3      | 71.9      | 71.6      | 72         |

All dates are relative to week  $T_k$ , the cluster-specific date on which the intervention cluster in each pair received the intervention. Figures are power to reject a null hypothesis of no difference between the treatment and control cluster. Power is based on incidence in all weeks from the date of intervention,  $T_k$ , up to the week indicated. Probability is calculated across 19 paired comparisons except for Static Rank Order Holdback-1 with 18 paired comparisons. In all cases, the probability is calculated using a permutation test based on pairwise comparisons of incidence in 1000 simulations, with 2000 permutations per test.

**Supplementary Table 2: Parameter values for primary simulations**

|                                                           |                     |
|-----------------------------------------------------------|---------------------|
| Cluster characteristics †                                 |                     |
| Number of clusters                                        | 20                  |
| Number of individuals per clusters                        | 200                 |
| Mean (standard deviation) within-cluster degree           | 4.5 (0) & 5 (0)     |
| Mean (standard deviation) between-cluster degree          | 1 (0.5) & 0.5 (0.5) |
| Infection characteristics                                 |                     |
| Number of initial infections                              | 4                   |
| Per-day risk of transmission from contact:                |                     |
| Infectious at home ( $\beta_I$ )                          | 7.5%                |
| Hospitalized ( $\beta_H$ )                                | 3.75%               |
| Deceased, not buried ( $\beta_F$ )                        | 10%                 |
| Mean duration in state (days):                            |                     |
| Incubation period ( $\gamma_E^{-1}$ )                     | 9                   |
| From symptom onset to hospitalization ( $\gamma_H^{-1}$ ) | 5                   |
| From symptom onset to recovery ( $\gamma_I^{-1}$ )        | 10                  |
| From symptom onset to death ( $\gamma_D^{-1}$ )           | 10                  |
| From hospitalization to recovery ( $\gamma_{IH}^{-1}$ )   | 5                   |
| From hospitalization to death ( $\gamma_{DH}^{-1}$ )      | 5                   |
| From death to burial ( $\gamma_F^{-1}$ )                  | 2                   |
| Proportion of cases hospitalized ( $\theta$ )             | 0.5                 |
| $\theta_I$                                                | 0.33                |
| Case-fatality rate:                                       |                     |
| Without hospitalization ( $\delta_I$ )                    | 0.75                |
| With hospitalization ( $\delta_H$ )                       | 0.65                |
| Vaccination characteristics                               |                     |
| Time between vaccination rounds                           | 7 days              |
| Clusters vaccinated per round                             | 1                   |
| Pause period for evaluation, Parallel trials              | 70 days             |
| Proportion of cluster residents successfully vaccinated   | 80%                 |
| Probability of vaccination removing individual            | 95%                 |

† The 20 study clusters were divided into two groups; both had the same mean number of contacts per person, but individuals in clusters in one group had (on average) twice as many between-cluster contacts as the other.

**Supplementary Table 3: Key epidemic and study outcomes for sensitivity analyses**

|                                       | Standard Stepped Wedge |               | Static Rank Strict Order |               | Static Rank Fuzzy Order |               | Static Rank Holdback-1 |               |
|---------------------------------------|------------------------|---------------|--------------------------|---------------|-------------------------|---------------|------------------------|---------------|
| <b>Time to end of epidemic (days)</b> |                        |               |                          |               |                         |               |                        |               |
| Baseline                              | 226                    | [216 - 240]   | 229                      | [217 - 242]   | 227                     | [217 - 241]   | 226                    | [216 - 240]   |
| Negative control                      | 292                    | [272 - 315]   | 292                      | [270 - 314]   | 290                     | [271 - 314]   | 292                    | [270 - 316]   |
| Poor vaccine                          | 281                    | [255 - 314]   | 287                      | [259 - 323]   | 290                     | [262 - 325]   | 287                    | [260 - 325]   |
| Perfect vaccine                       | 210                    | [203 - 218]   | 207                      | [199 - 216]   | 208                     | [200 - 216]   | 208                    | [201 - 216]   |
| Perfect vaccine incl. Exposed         | 221                    | [210 - 235]   | 219                      | [207 - 232]   | 219                     | [208 - 232]   | 219                    | [208 - 233]   |
| Week 8 vaccine                        | 233                    | [221 - 247]   | 238                      | [227 - 252]   | 237                     | [226 - 250]   | 238                    | [226 - 250]   |
| Week 10 vaccine                       | 240                    | [228 - 254]   | 245                      | [234 - 259]   | 244                     | [233 - 257]   | 244                    | [232 - 258]   |
| Low between-cluster heterogeneity     | 229                    | [218 - 242]   | 229                      | [220 - 243]   | 230                     | [218 - 242]   | 228.5                  | [218 - 243]   |
| High between-cluster heterogeneity    | 226                    | [215 - 240]   | 226                      | [214 - 238]   | 226                     | [214 - 239]   | 226                    | [216 - 240]   |
| Lognormal within-cluster ties         | 227                    | [216 - 240]   | 228                      | [217 - 241]   | 228                     | [216 - 242]   | 228                    | [218 - 241]   |
| 14 days between interventions         | 273                    | [255 - 294]   | 292                      | [268 - 318]   | 290                     | [268 - 318]   | 288                    | [267 - 311]   |
| 21 days between interventions         | 284                    | [264 - 306]   | 299                      | [275 - 332]   | 299                     | [276 - 329]   | 296.5                  | [273 - 325]   |
| Lower infectiousness                  | 198                    | [173 - 217]   | 184                      | [156 - 204]   | 185                     | [156 - 205]   | 186                    | [155 - 205]   |
| Outside population                    | 260                    | [241 - 286]   | 277                      | [253 - 309]   | 278                     | [253 - 307]   | 274                    | [251 - 304]   |
| <b>Cumulative incidence (%)</b>       |                        |               |                          |               |                         |               |                        |               |
| Baseline                              | 35.8                   | [28.0 - 42.0] | 29.7                     | [20.6 - 37.8] | 29.6                    | [21.3 - 37.0] | 31.2                   | [22.6 - 38.6] |
| Negative control                      | 80.0                   | [78.9 - 80.9] | 80.0                     | [78.9 - 80.9] | 79.9                    | [78.7 - 80.9] | 80.0                   | [78.8 - 81.0] |
| Poor vaccine                          | 44.0                   | [36.4 - 49.4] | 40.2                     | [31.6 - 47.6] | 39.9                    | [31.3 - 47.0] | 41.0                   | [31.7 - 48.3] |
| Perfect vaccine                       | 31.3                   | [24.1 - 37.4] | 24.5                     | [16.0 - 32.5] | 25.6                    | [17.6 - 32.8] | 25.2                   | [17.8 - 33.9] |
| Perfect vaccine incl. Exposed         | 30.2                   | [22.1 - 36.1] | 24.5                     | [16.0 - 32.2] | 24.6                    | [16.9 - 32.2] | 24.9                   | [17.3 - 31.9] |
| Week 8 vaccine                        | 43.8                   | [35.9 - 49.8] | 40.4                     | [30.6 - 48.3] | 40.7                    | [31.5 - 48.3] | 40.9                   | [31.1 - 48.3] |
| Week 10 vaccine                       | 50.9                   | [43.1 - 57.0] | 49.1                     | [40.1 - 56.6] | 50.3                    | [41.1 - 57.7] | 50.3                   | [41.0 - 58.0] |
| Low between-cluster heterogeneity     | 35.2                   | [27.6 - 40.2] | 31.4                     | [22.8 - 38.6] | 31.5                    | [23.3 - 38.6] | 31.6                   | [23.7 - 38.3] |
| High between-cluster heterogeneity    | 36.3                   | [28.0 - 43.6] | 28.9                     | [19.3 - 38.0] | 29.1                    | [19.0 - 37.6] | 30.5                   | [21.2 - 39.2] |
| Lognormal within-cluster ties         | 34.7                   | [26.8 - 41.0] | 29.4                     | [20.2 - 36.9] | 29.2                    | [20.5 - 37.1] | 30.2                   | [21.3 - 38.2] |
| 14 days between interventions         | 56.1                   | [51.4 - 59.8] | 54.4                     | [48.9 - 59.2] | 55.2                    | [49.4 - 59.3] | 55.4                   | [50.0 - 59.7] |
| 21 days between interventions         | 63.5                   | [60.4 - 66.3] | 63.2                     | [59.2 - 66.5] | 63.4                    | [59.1 - 66.2] | 63.4                   | [59.8 - 66.3] |
| Lower infectiousness                  | 3.4                    | [1.8 - 5.5]   | 3.1                      | [1.7 - 4.6]   | 2.9                     | [1.6 - 4.8]   | 3.1                    | [1.7 - 4.8]   |
| Outside population                    | 18.5                   | [15.9 - 20.9] | 16.6                     | [13.6 - 19.6] | 16.8                    | [13.3 - 19.8] | 16.8                   | [13.9 - 19.8] |
| <b>Power after one week</b>           |                        |               |                          |               |                         |               |                        |               |
| Baseline                              | 61.8                   | [58.8 - 64.8] |                          |               | 45.8                    | [42.7 - 48.9] | 56.3                   | [53.2 - 59.4] |
| Negative control                      | 4.5                    | [3.2 - 5.8]   |                          |               | 4.7                     | [3.4 - 6.0]   | 3.7                    | [2.5 - 4.9]   |
| Poor vaccine                          | 29.9                   | [27.1 - 32.7] |                          |               | 24.5                    | [21.8 - 27.2] | 28.6                   | [25.8 - 31.4] |
| Perfect vaccine                       | 81.2                   | [78.8 - 83.6] |                          |               | 62.4                    | [59.4 - 65.4] | 69.8                   | [67.0 - 72.6] |
| Perfect vaccine incl. Exposed         | 91.1                   | [89.3 - 92.9] |                          |               | 70.9                    | [68.1 - 73.7] | 87.4                   | [85.3 - 89.5] |
| Week 8 vaccine                        | 60.9                   | [57.9 - 63.9] |                          |               | 58.1                    | [55.0 - 61.2] | 66.4                   | [63.5 - 69.3] |
| Week 10 vaccine                       | 63.9                   | [60.9 - 66.9] |                          |               | 59.8                    | [56.8 - 62.8] | 70.0                   | [67.2 - 72.8] |
| Low between-cluster heterogeneity     | 62.9                   | [59.9 - 65.9] |                          |               | 48.7                    | [45.6 - 51.8] | 59.4                   | [56.4 - 62.4] |
| High between-cluster heterogeneity    | 60.9                   | [57.9 - 63.9] |                          |               | 48.0                    | [44.9 - 51.1] | 56.0                   | [52.9 - 59.1] |
| Lognormal within-cluster ties         | 60.2                   | [57.2 - 63.2] |                          |               | 47.2                    | [44.1 - 50.3] | 56.3                   | [53.2 - 59.4] |
| 14 days between interventions         | 4.2                    | [3.0 - 5.4]   |                          |               | 5.2                     | [3.8 - 6.6]   | 5.6                    | [4.2 - 7.0]   |
| 21 days between interventions         | 4.2                    | [3.0 - 5.4]   |                          |               | 4.7                     | [3.4 - 6.0]   | 4.7                    | [3.4 - 6.0]   |
| Lower infectiousness                  | 10.4                   | [8.5 - 12.3]  |                          |               | 6.7                     | [5.2 - 8.2]   | 7.0                    | [5.4 - 8.6]   |
| Outside population                    | 72.0                   | [69.2 - 74.8] |                          |               | 67.1                    | [64.2 - 70.0] | 75.6                   | [72.9 - 78.3] |

Notes. All outcome figures are medians and interquartile ranges of result from 1000 simulation realizations. Time to end of epidemic measured in days since first infections; cumulative incidence measured as percentage of all individuals ever infected.

### Supplementary Figure 1: Schematic of state transition model

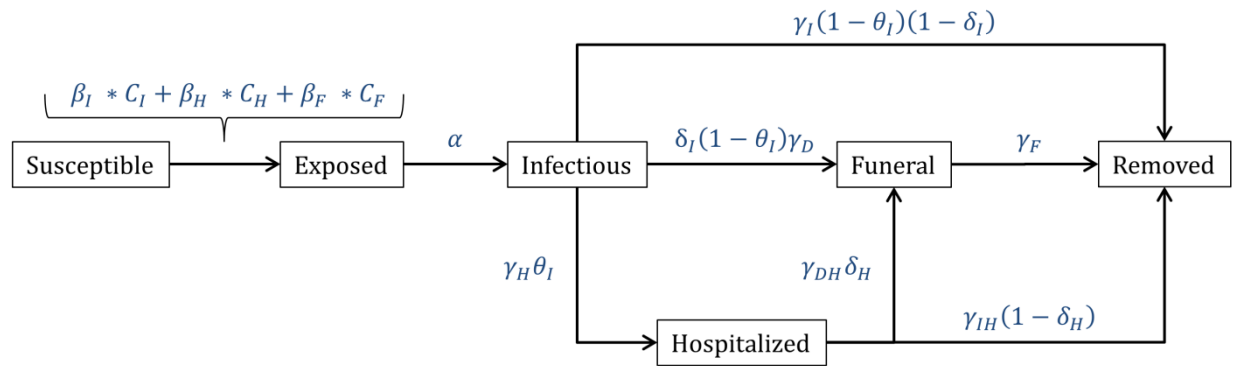

$\beta_I, \beta_H$  and  $\beta_F$  are the transmission risk to a susceptible individual if one of their contacts is, respectively, infectious at home ( $C_I$ ), hospitalized ( $C_H$ ) or deceased but not yet buried ( $C_F$ ). The inverse of each  $\gamma$  term reflects the mean duration in a state: incubation period ( $\gamma_E$ ); time from symptom onset to hospitalization ( $\gamma_H$ ); time from symptom onset to recovery without hospitalization ( $\gamma_I$ ); time from symptom onset to death without hospitalization ( $\gamma_D$ ); time from hospitalization to recovery ( $\gamma_{IH}$ ); time from hospitalization to death ( $\gamma_{DH}$ ); and time to burial from death ( $\gamma_F$ ).

$\theta_I$  is computed to fix the proportion of individuals hospitalized, allowing for competing risks of death or recovery,  $\delta_I$  and  $\delta_H$  are computed to fix the overall case-fatality ratio. Details, including equations for  $\theta_I, \delta_I$  and  $\delta_H$ , can be found in Tables 2 and 3 of [23].

Supplementary Figure 2: Mean state values for each day since the start of the epidemic across 1000 simulations

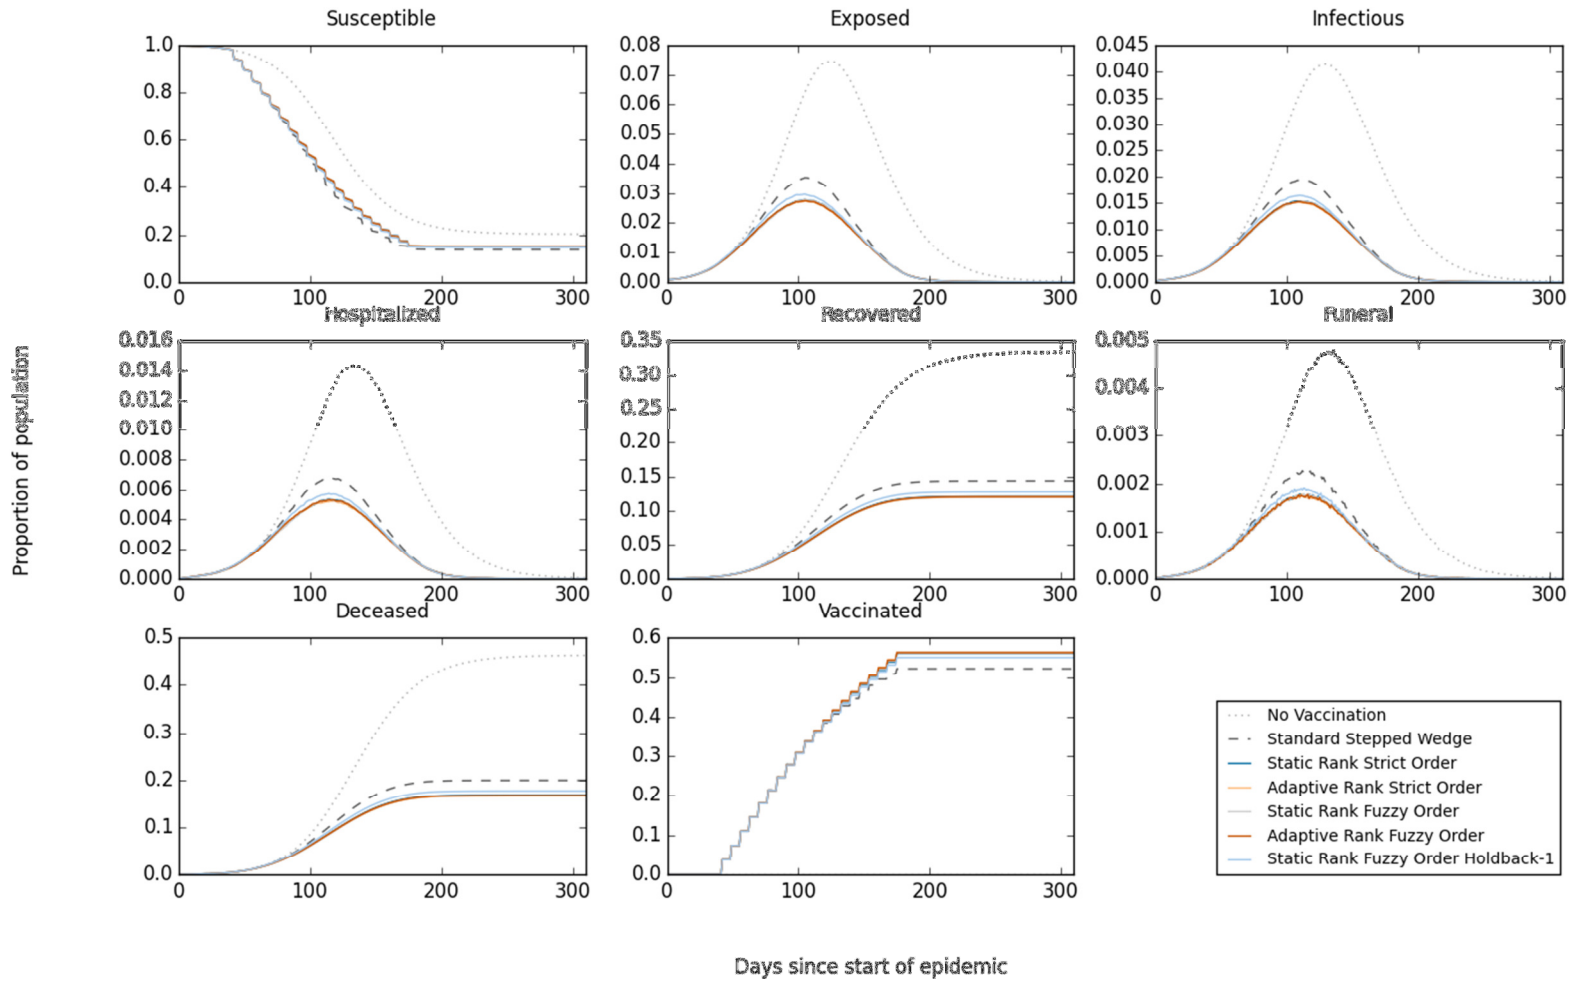

Supplementary Figure 3: Mean daily effective reproductive rate for each vaccination study design across 1000 simulations

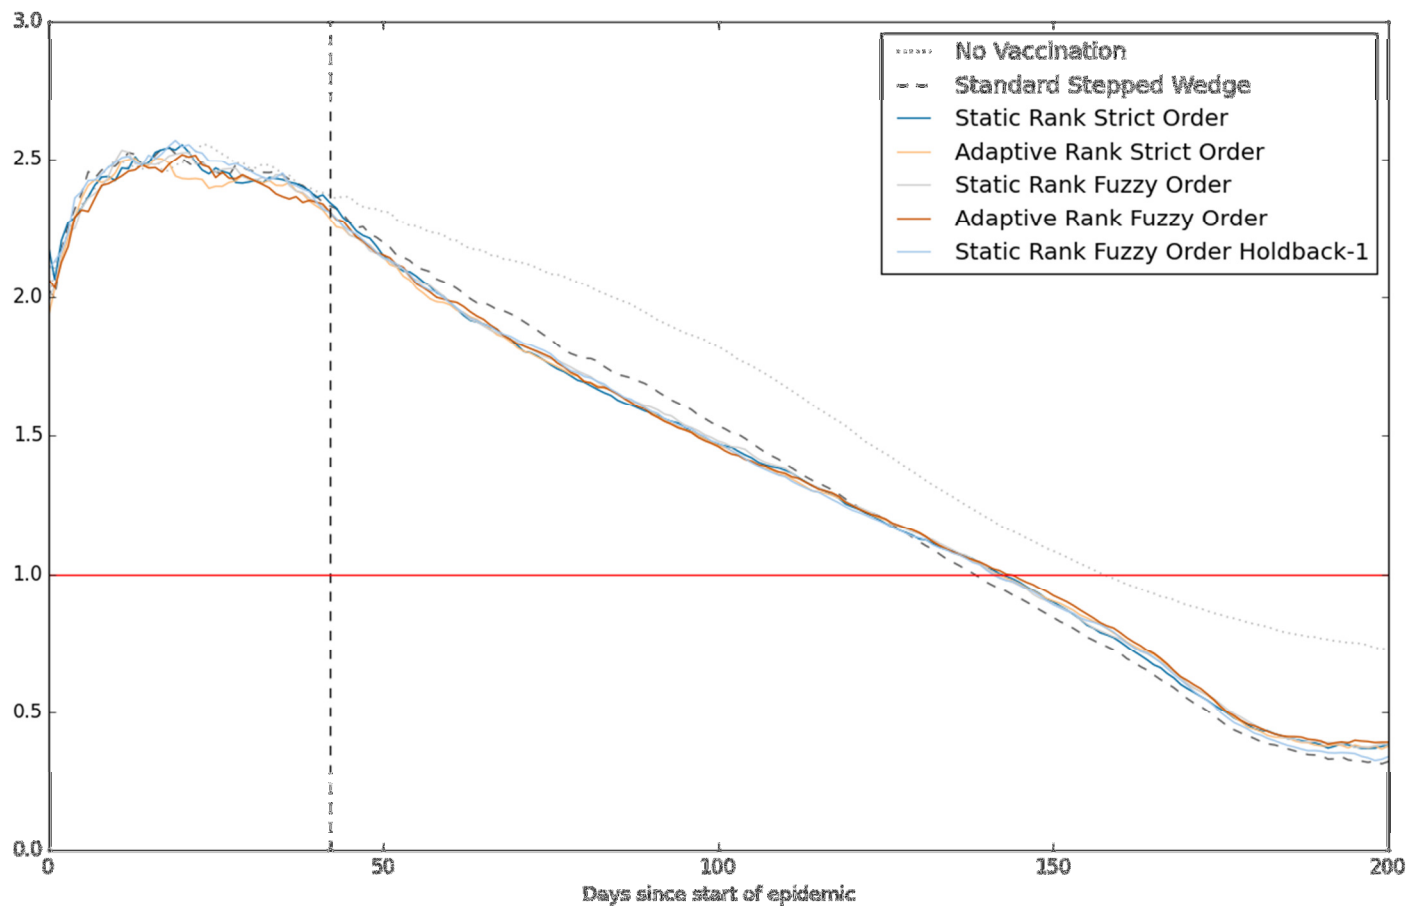

Vertical dashed line represents date of first cluster vaccination; horizontal solid line represents  $R_e=1$ .



Leveraging contact network structure in the design of cluster randomized trials

|                                                                 |                                                                                                                                                                                                                                                                                                                                                                                                                                                                                                                                                                                                                                                                                                                                                                                                                                                                                                                                                                                                                                                                                                                                                                                                                                                                                                                                                                                                                                                                                                                                                                                                                                                                                                                                                                                                                                                                                                                                                                                                                                                                                                                                                                                                                                                                                                                                                                                                                                                                                                                                                                                                                                                                                                                                                                                                                                                                                                                       |
|-----------------------------------------------------------------|-----------------------------------------------------------------------------------------------------------------------------------------------------------------------------------------------------------------------------------------------------------------------------------------------------------------------------------------------------------------------------------------------------------------------------------------------------------------------------------------------------------------------------------------------------------------------------------------------------------------------------------------------------------------------------------------------------------------------------------------------------------------------------------------------------------------------------------------------------------------------------------------------------------------------------------------------------------------------------------------------------------------------------------------------------------------------------------------------------------------------------------------------------------------------------------------------------------------------------------------------------------------------------------------------------------------------------------------------------------------------------------------------------------------------------------------------------------------------------------------------------------------------------------------------------------------------------------------------------------------------------------------------------------------------------------------------------------------------------------------------------------------------------------------------------------------------------------------------------------------------------------------------------------------------------------------------------------------------------------------------------------------------------------------------------------------------------------------------------------------------------------------------------------------------------------------------------------------------------------------------------------------------------------------------------------------------------------------------------------------------------------------------------------------------------------------------------------------------------------------------------------------------------------------------------------------------------------------------------------------------------------------------------------------------------------------------------------------------------------------------------------------------------------------------------------------------------------------------------------------------------------------------------------------------|
| Manuscript ID:                                                  | CT-16-0002.R2                                                                                                                                                                                                                                                                                                                                                                                                                                                                                                                                                                                                                                                                                                                                                                                                                                                                                                                                                                                                                                                                                                                                                                                                                                                                                                                                                                                                                                                                                                                                                                                                                                                                                                                                                                                                                                                                                                                                                                                                                                                                                                                                                                                                                                                                                                                                                                                                                                                                                                                                                                                                                                                                                                                                                                                                                                                                                                         |
| Funding Information:                                            | U.S. Department of Health and Human Services ><br>National Institutes of Health ><br><b>National Institute of Allergy and Infectious Diseases</b><br>R01 AI24643<br>R37 AI51164                                                                                                                                                                                                                                                                                                                                                                                                                                                                                                                                                                                                                                                                                                                                                                                                                                                                                                                                                                                                                                                                                                                                                                                                                                                                                                                                                                                                                                                                                                                                                                                                                                                                                                                                                                                                                                                                                                                                                                                                                                                                                                                                                                                                                                                                                                                                                                                                                                                                                                                                                                                                                                                                                                                                       |
| Submitting Author:                                              | <div style="border: 1px solid black; padding: 2px; display: inline-block;">Harling, Guy</div> <input checked="" type="checkbox"/> Save  <a href="#">Harling, Guy (proxy)</a>                                                                                                                                                                                                                                                                                                                                                                                                                                                                                                                                                                                                                                                                                                                                                                                                                                                                                                                                                                                                                                                                                                                                                                                                                                                                                                                                                                                                                                                                                                                                                                                                                                                                                                                                                                                                                                                                                                                                                                                                                                                                                                                                                                                                                                                                                                                                                                                                                                                                                                                                                                                                                                                         |
| Authors & Institutions:                                         | <ul style="list-style-type: none"> <li> <span style="display: inline-block; vertical-align: middle; margin-right: 10px;">  <a href="#">Harling, Guy proxy</a> </span> <ul style="list-style-type: none"> <li> <span style="display: inline-block; vertical-align: middle; margin-right: 10px;">  </span>           Harvard T.H. Chan School of Public Health - Global Health and Population<br/>           Boston, Massachusetts<br/>           United States         </li> </ul> </li> <li> <span style="display: inline-block; vertical-align: middle; margin-right: 10px;">  <a href="#">Wang, Rui proxy</a> </span> <ul style="list-style-type: none"> <li> <span style="display: inline-block; vertical-align: middle; margin-right: 10px;">  </span>           Harvard T.H. Chan School of Public Health - Biostatistics<br/>           Boston, Massachusetts<br/>           United States         </li> <li> <span style="display: inline-block; vertical-align: middle; margin-right: 10px;">  </span>           Brigham and Women\'s Hospital  - Medicine<br/>           Boston, Massachusetts<br/>           United States         </li> </ul> </li> <li> <span style="display: inline-block; vertical-align: middle; margin-right: 10px;">  <a href="#">Onnela, Jukka-Pekka proxy</a> </span> <ul style="list-style-type: none"> <li> <span style="display: inline-block; vertical-align: middle; margin-right: 10px;">  </span>           Harvard T.H. Chan School of Public Health - Biostatistics<br/>           Boston, Massachusetts<br/>           United States         </li> </ul> </li> <li> <span style="display: inline-block; vertical-align: middle; margin-right: 10px;">  <a href="#">DeGruttola, Victor proxy</a> </span> <ul style="list-style-type: none"> <li> <span style="display: inline-block; vertical-align: middle; margin-right: 10px;">  </span>           Harvard T.H. Chan School of Public Health - Biostatistics<br/>           Boston, Massachusetts<br/>           United States         </li> </ul> </li> </ul> |
| Contact Author (populates the ##PROLE_AUTHOR_..## e-mail tags): | <div style="border: 1px solid black; padding: 2px; display: inline-block;">Harling, Guy</div> <input checked="" type="checkbox"/> Save     Current Contact Author: Harling, Guy ( <a href="#">proxy</a> )                                                                                                                                                                                                                                                                                                                                                                                                                                                                                                                                                                                                                                                                                                                                                                                                                                                                                                                                                                                                                                                                                                                                                                                                                                                                                                                                                                                                                                                                                                                                                                                                                                                                                                                                                                                                                                                                                                                                                                                                                                                                                                                                                                                                                                                                                                                                                                                                                                                                                                                                                                                                                                                                                                             |
| Running Head:                                                   | Connectivity-informed designs for cluster trials                                                                                                                                                                                                                                                                                                                                                                                                                                                                                                                                                                                                                                                                                                                                                                                                                                                                                                                                                                                                                                                                                                                                                                                                                                                                                                                                                                                                                                                                                                                                                                                                                                                                                                                                                                                                                                                                                                                                                                                                                                                                                                                                                                                                                                                                                                                                                                                                                                                                                                                                                                                                                                                                                                                                                                                                                                                                      |
| Keywords:                                                       | Vaccine  , Cluster Randomized Trial  , Ebola  , Network  , Epidemic Control  , Power                                                                                                                                                                                                                                                                                                                                                                                                                                                                                                                                                                                                                                                                                                                                                                                                                                                                                                                                                                                                                                                                                                                                                                                                                                                                                                                                                                                                                                                                                                                                                                                                                                                                                                                                                                                                                                                                                                                                                                                                                                                                                                                                                                                                                                                                                                          |
